# Supplementary material for: Use of Guideline-Directed Medical Therapy in Patients Aged ≥ 65 Years After the Diagnosis of Heart Failure: A Canadian Population-Based Study
Source: PubMed Central journal article supplement — CJC Open. 2022 Aug 11;4(12):1015–23. doi: 10.1016/j.cjco.2022.08.003 (PMC9764132; doi:10.1016/j.cjco.2022.08.003), 2022-08-11
Supplement: mmc1.pdf [file mmc1.pdf]

**Supplemental Figure S1.** Schematic presentation of HF pharmacotherapy algorithm

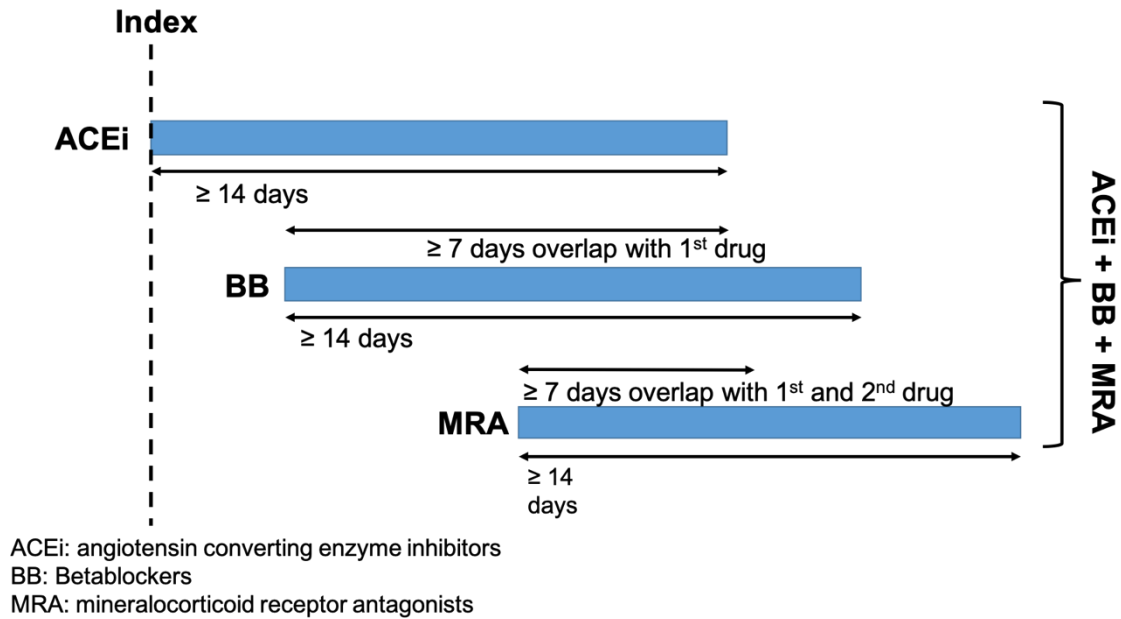

**Supplemental Figure S2.** Average proportion of maximum GDMT Intensity score calculated daily over 6 months post index discharge for patients with HFrEF alive at 6 months.

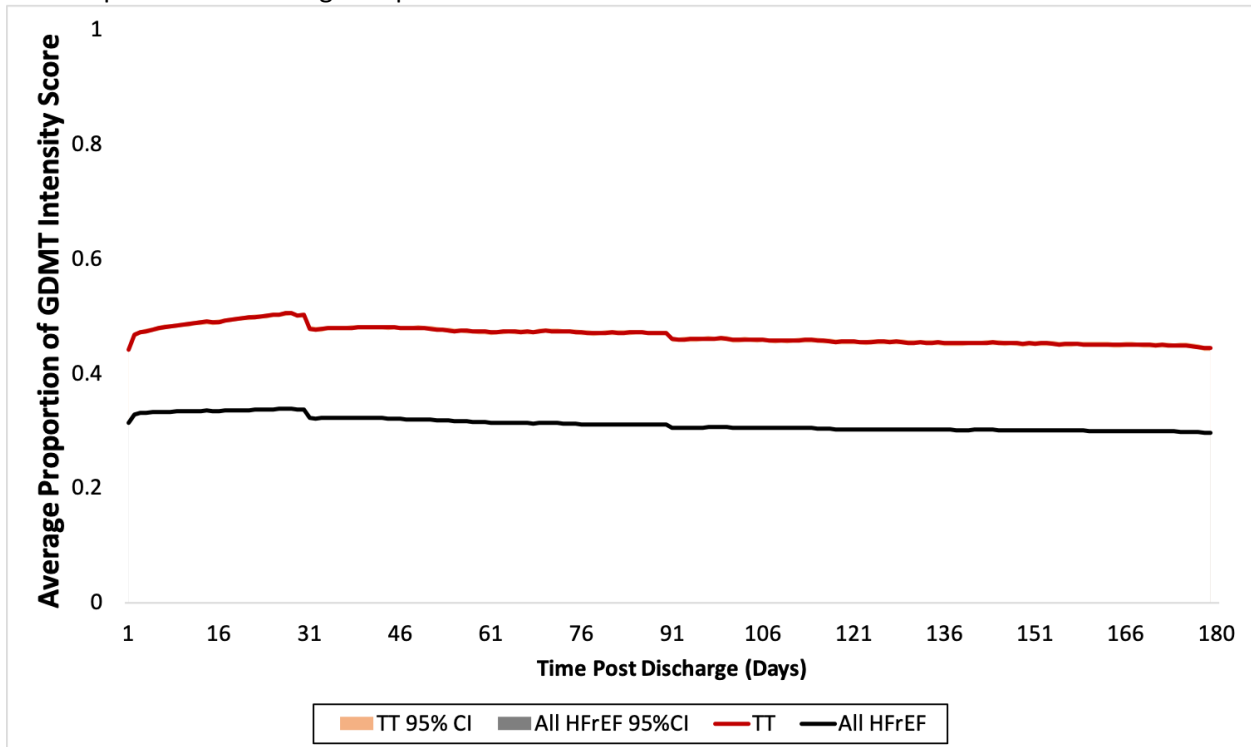

Only patients with HFrEF that were alive 6 months post discharge were included. Each data points are the average intensity scores with 95%CI for all patients with HFrEF (black, n=55,882) or patients with HFrEF on triple therapy (red, n=11,983) divided by the maximum achievable Intensity score (14). GDMT: guideline-directed medical therapy; HFrEF: heart failure with reduced ejection fraction.

**Supplemental Table S1.** Uijl Model coefficients and codes.

| Variable                                                                                     | Coefficient ln(OR) | ICD / CCI / ATC codes                                                                                                                                                                                                                                                            | When measured                              |
|----------------------------------------------------------------------------------------------|--------------------|----------------------------------------------------------------------------------------------------------------------------------------------------------------------------------------------------------------------------------------------------------------------------------|--------------------------------------------|
| Intercept                                                                                    | 0.3646             |                                                                                                                                                                                                                                                                                  |                                            |
| Age ( > 75yrs)                                                                               | 0.2776             |                                                                                                                                                                                                                                                                                  | At index                                   |
| Sex (female)                                                                                 | 0.6881             |                                                                                                                                                                                                                                                                                  | at index                                   |
| Ischemic heart disease                                                                       | -0.2485            | I21 – I25                                                                                                                                                                                                                                                                        | 1 year prior to index + 30 days post index |
| Anemia                                                                                       | 0.2070             | D50-D53, D55-D64                                                                                                                                                                                                                                                                 | 1 year prior to index + 30 days post index |
| Atrial fibrillation                                                                          | 0.4187             | I48.x                                                                                                                                                                                                                                                                            | 1 year prior to index + 30 days post index |
| COPD                                                                                         | 0.2070             | J41.x, J42.x, J44.x, J43.x                                                                                                                                                                                                                                                       | 1 year prior to index + 30 days post index |
| Diabetes                                                                                     | 0.0583             | ICD10: E10, E11, E12, E13, E14                                                                                                                                                                                                                                                   | 1 year prior to index + 30 days post index |
| Hypertension                                                                                 | 0.5306             | I10, I11 I15, I12, I13                                                                                                                                                                                                                                                           | 1 year prior to index + 30 days post index |
| Valvular disease                                                                             | 0.1222             | I05.0, I05.1, I05.2, I05.8, I05.9, I06.0, I06.1, I06.2, I06.8, I06.9, I08.0, I08.8, I08.9, I07.1, I07.2, I07.8, I09.89, I09.1, I09.9, I09.81, I09.89, Z95.3, Z95.2, 1.HU, 1.HS, 1.HT, 1.HV, 1.HW                                                                                 | 1 year prior to index + 30 days post index |
| Malignant cancer                                                                             | 0.0862             | C00.x–C26.x, C30.x–C34.x, C37.x–C41.x, C43.x, C45.x–C58.x, C60.x–C76.x, C77.x–C80.x, C81.x–C85.x, C88.x, C90.x–C97.x                                                                                                                                                             | 3 year prior to and including index        |
| Device therapy (implantable cardioverter defibrillator or cardiac resynchronization therapy) | -1.0788            | CRT (CCI codes: 1.HZ.53.GR-NM, 1.HZ.53.LA-NM, 1.HZ.53.QA-NM, 1.HZ.53.GR-NK, 1.HZ.53.LA-NK, 1.HZ.53.QA-NK, 1.HZ.53.GR-NL, 1.HZ.53.LA-NL, 1.HZ.53.QA-NL, 1.HZ.53.GR-FR, 1.HZ.53.LA-FR, 1.HZ.53.SY-FR), ICD (CCI codes: 1.HZ.53.GR-FS, 1.HZ.53.HA-FS, 1.HZ.53.LA-FS, 1.HZ.53.SY-FS) | 1 year prior to index + 30 days post index |

|                    |         |                                                                                                                               |                                                 |
|--------------------|---------|-------------------------------------------------------------------------------------------------------------------------------|-------------------------------------------------|
| RAAS inhibitor use | -0.7765 | C09A C09B, C09C C09D                                                                                                          | 6 months prior to index<br>+ 30 days post index |
| Beta blocker use   | -0.5978 | C07                                                                                                                           | 6 months prior to index<br>+ 30 days post index |
| MRA                | -0.3711 | C03DA01, C03DA04                                                                                                              | 6 months prior to index<br>+ 30 days post index |
| Digoxin            | -0.1985 | C01AA05                                                                                                                       | 6 months prior to index<br>+ 30 days post index |
| Diuretics          | -0.3011 | C03CA01, C03CA02, C03CA04,<br>C03CC01, C03AA01, C03AA03,<br>C03AA08, C03BA04, C03BA08,<br>C03BA11, C03DB01 C03DB02<br>C03EA01 | 6 months prior to index<br>+ 30 days post index |

**Supplemental Table S2.** Evidence based heart failure medication and doses recommended by the Canadian Cardiovascular Society

| Medication Class | Drug Name            | Target Dose | ATC code                                                               |
|------------------|----------------------|-------------|------------------------------------------------------------------------|
| ACEi             | Enalapril            | 10 mg BID   | C09AA02, C09BA02, C09BB02, C09BB06                                     |
|                  | Lisinopril           | 20 mg       | C09AA03, C09BA03, C09BB03                                              |
|                  | Perindopril          | 4 mg        | C09AA04, C09BA04, C09BB04, C09BX02                                     |
|                  | Ramipril             | 5 mg BID    | C09AA05, C09BA05, C09BB05                                              |
|                  | Trandolapril         | 4 mg        | C09AA10, C09BB10                                                       |
| ARB              | Candesartan          | 32 mg       | C09CA06, C09DA06, C09DB07                                              |
|                  | Valsartan            | 160 mg BID  | C09CA03, C09DA03, C09DB01, C09DB08, C09DX01, C09DX02, C09DX04, C09DX05 |
| MRA              | Spirololactone       | 50 mg       | C03DA01                                                                |
|                  | Eplerenone           | 50 mg       | C03DA04                                                                |
| BB               | Carvedilol           | 25 mg BID   | C07AG02, C07FX06                                                       |
|                  | Bisoprolol           | 10 mg       | C07AB07, C07FX04, C07FB07, C07BB07                                     |
|                  | Metoprolol           | 200 mg      | C07AB02, C07FX03, C07FB13, C07FB02, C07FX05, C07BB02, C07CB02          |
| Ivabradine       | Ivabradine           | 7.5 mg BID  | C01EB17, C07FX06, C07FX05                                              |
| ARNI             | Sacubitril/Valsartan | 200 mg BID  | C09DX04                                                                |
| SGLT2 inhibitors | Empagliflozin        | -           | A10BK03                                                                |
|                  | Dapagliflozin        |             | A10BK01                                                                |
|                  | Canagliflozin        |             | A10BK02                                                                |

\*BID: twice a day

**Supplemental Table S3.** Patients achieving each category of therapy (no-, mono-, dual-, triple-) with prescription overlap of 7 days and 14 days.

| Therapy        | 7 days overlap | 14 days overlap |
|----------------|----------------|-----------------|
| No therapy     | 54,163 (27.2%) | 54,163 (27.2%)  |
| Monotherapy    | 68,216 (34.2%) | 68,646 (34.4%)  |
| Dual therapy   | 59,894 (30.0%) | 59,736 (30.0%)  |
| Triple therapy | 16,928 (8.5%)  | 16,662 (8.4%)   |

**Supplemental Table S4.** Conversion of guideline directed medication dosage to an intensity score

| Conversion and standardization of medication class                                                                                                                             | Score assigned to converted dose levels                                                                                               |
|--------------------------------------------------------------------------------------------------------------------------------------------------------------------------------|---------------------------------------------------------------------------------------------------------------------------------------|
| Beta blockers converted to carvedilol equivalent (CarvEquiv)<br><br>CarvEquiv = Carvedilol TDD<br>CarvEquiv = Metoprolol TDD / 2<br>CarvEquiv = Bisoprolol TDD * 5             | 0 mg = 0<br>< 6.25 mg = 0.5<br>6.25 – 12.49 mg = 1<br>12.5 – 24.99 mg = 2<br>25.0 – 37.49 mg = 3<br>37.5 – 49.9 mg = 4<br>≥ 50 mg = 5 |
| ACEi converted to lisinopril equivalent (LisEquiv)<br><br>LisEquiv = Lisinopril TDD<br>LisEquiv = Perindopril TDD * 5<br>LisEquiv = Trandolapril * 5<br>LisEquiv = Ramipril *2 | 0 mg = 0<br>< 5.0 mg = 0.5<br>5.0 – 9.9 mg = 1<br>10 – 14.9 mg = 2<br>15 – 19.9 mg = 3<br>20 – 39.9 mg = 4<br>≥ 40 mg = 5             |
| ARB converted to losartan equivalent (LosEquiv)<br><br>LosEquiv = Candesartan TDD * 6<br>LosEquiv = Valsartan TDD * 0.6                                                        | 0 mg = 0<br>< 25 mg = 1<br>25 – 49.9 mg = 2<br>50 – 74.9 mg = 3<br>75 – 99.9 mg = 4<br>≥ 100 mg = 5                                   |
| MRA converted to spironolactone equivalents (SpiroEquiv)<br><br>SpiroEquiv = spironolactone TDD<br>SpiroEquiv = Eplerenone TDD                                                 | 0 mg = 0<br>< 25 mg = 1<br>25 – 37.49 mg = 2<br>37.5 – 49.9 mg = 3<br>≥ 50 mg = 4                                                     |
| ARNI<br>Sacubitril/Valsartan                                                                                                                                                   | 0mg = 0<br>≤ 50mg = 3<br>>50mg = 5                                                                                                    |

\*TDD = total daily dose

**Supplemental Table S5.** Specific drug classification for all patients with HF on mono, double or triple therapy

|                                                      | <b>All HF patients</b>        |                              | <b>Alive patients</b>         |                              |
|------------------------------------------------------|-------------------------------|------------------------------|-------------------------------|------------------------------|
|                                                      | All HF patients<br>n = 68,846 | HFrEF Patients<br>n = 17,184 | All HF patients<br>n = 56,048 | HFrEF Patients<br>n = 13,935 |
| <b>Monotherapy</b>                                   |                               |                              |                               |                              |
| Monotherapy with ACEi                                | 18,552 (26.9)                 | 4,765 (27.7)                 | 15,495 (27.6)                 | 3,951 (28.4)                 |
| Monotherapy with ARB                                 | 4,967 (7.2)                   | 1,066 (6.2)                  | 4,186 (7.5)                   | 889 (6.4)                    |
| Monotherapy with BB                                  | 40,438 (58.7)                 | 10,204 (59.4)                | 32,531 (58.0)                 | 8,224 (59.0)                 |
| Monotherapy with MRA                                 | 4,528 (6.6)                   | 1,058 (6.2)                  | 3,515 (6.3)                   | 793 (5.7)                    |
| Switch between ACEi, ARB and or ARNi                 | 361 (0.5)                     | 91 (0.5)                     | 321 (0.6)                     | 78 (0.6)                     |
|                                                      |                               |                              |                               |                              |
| <b>Double Therapy</b>                                | n = 60,641                    | n = 30,912                   | n = 52,407                    | n = 26,760                   |
| Double therapy with ACEi and BB                      | 38,647 (63.7)                 | 20,455 (66.2)                | 33,571 (64.1)                 | 17,792 (66.5)                |
| Double therapy with ARB and BB                       | 8,020 (13.2)                  | 3,570 (11.6)                 | 7,025 (13.4)                  | 3137 (11.7)                  |
| Double therapy with ACEi and MRA                     | 3,158 (5.2)                   | 1,623 (5.3)                  | 2,656 (5.1)                   | 1355 (5.1)                   |
| Double therapy with ARB and MRA                      | 763 (1.3)                     | 352 (1.1)                    | 662 (1.3)                     | 305 (1.1)                    |
| Double therapy with BB and MRA                       | 8,252 (13.6)                  | 3,937 (12.7)                 | 6,843 (13.1)                  | 3275 (12.2)                  |
| Switch between (ACEi, ARB and or ARNi) + (BB or MRA) | 1,801 (3.0)                   | 975 (3.2)                    | 1,650 (3.1)                   | 896 (3.4)                    |
|                                                      |                               |                              |                               |                              |
| <b>Triple Therapy</b>                                | n = 17,536                    | n = 13,508                   | n = 15,586                    | n = 11,983                   |
| Triple therapy with ACEi, BB and MRA                 | 13,688 (78.1)                 | 10,644 (78.8)                | 12,102 (77.6)                 | 9,390 (78.4)                 |
| Triple therapy with ARB, BB, and MRA                 | 2,473 (14.1)                  | 1,779 (13.2)                 | 2,224 (14.3)                  | 1,597 (13.3)                 |
| (Switch between ACEi, ARB and or ARNi) + BB + MRA    | 1,375 (7.8)                   | 1,085 (8.0)                  | 1,260 (8.1)                   | 996 (8.3)                    |
| Triple therapy + SGLT2i (aka quadruple therapy)      | 244 (1.4)                     | 207 (1.5)                    | 222 (1.4)                     | 188 (1.6)                    |
